# Supplementary material
Source: PubMed Central journal article supplement (PMC3737379)
Supplement: NIHMS436927-supplement-01.pdf [file NIHMS436927-supplement-01.pdf]

**Table 1: Demographics, Clinical Exam Findings, and OCT Findings**

| Subject # | Sex | Ethnicity | Birth Data  |            | ROP Data        |                     |              | OCT Data               |              |                      |                          |
|-----------|-----|-----------|-------------|------------|-----------------|---------------------|--------------|------------------------|--------------|----------------------|--------------------------|
|           |     |           | PMA (weeks) | Weight (g) | ROP (Max Stage) | Treatment (wks PMA) | Plus Disease | Presence CME (wks PMA) | Severity CME | Inner retinal Layers | Age @ Last F/U (wks PMA) |
| DC_0452   | M   | Cauc      | 26          | 1010       | N               | none                | -            | N                      | 0            | 2                    | 39                       |
| DC_0497   | M   | Hisp      | 30 6/7      | 1080       | N               | none                | -            | N                      | 0            | 2                    | 36 4/7                   |
| DC_0499   | M   | Cauc      | 29          | 1200       | N               | none                | -            | N                      | 0            | 2                    | 35 1/7                   |
| DC_0755   | M   | Cauc      | 37          |            | N               | none                | -            | N                      | 0            | 0                    | 57 6/7                   |
| DC_0481   | M   | Cauc      | 31          | 1220       | N               | none                | -            | N                      | 0            | 2                    | 36 5/7                   |
| DC_0482   | F   | Cauc      | 29 2/7      | 690        | N               | none                | -            | N                      | 0            | 2                    | 38                       |
| DC_0572   | M   | Cauc      | 29 3/7      | 1420       | N               | none                | -            | N                      | 0            | 2                    | 35                       |
| DC_0951   | M   | Cauc      | 28 3/7      | 1090       | N               | none                | -            | N                      | 0            | 3                    | 32 3/7                   |
| DC_0881   | F   | AA        | 30          | 1450       | N               | none                | -            | N                      | 0            | 2                    | 33 6/7                   |
| DC_0878   | F   | AA        | 23 5/7      | 570        | N               | none                | -            | Y (33 1/7)             | 1            | 3                    | 37 1/7                   |
| DC_0593   | M   | Cauc      | 32          | 2240       | N               | none                | -            | Y (47 6/7)             | 2            | 0                    | 47 6/7                   |
| DC_0806   | M   | Cauc      | 29 5/7      | 1380       | N               | none                | -            | Y (34 5/7)             | 1 §          | 2                    | 39 5/7                   |
| DC_0839   | M   | Cauc      | 25          | 910        | N               | none                | -            | Y (34 6/7)             | 3            | 3                    | 38 6/7                   |
| DC_0840   | M   | Cauc      | 25 5/7      | 815        | N               | none                | -            | Y (34 6/7)             | 1+           | 3                    | 43 6/7                   |
| DC_0845   | M   | Cauc      | 26 3/7      | 1120       | N               | none                | -            | Y (32)                 | 2            | 2                    | 38                       |
| DC_0568   | M   | Cauc      | 26 3/7      | 910        | N               | none                | -            | Y (34 5/7)             | 2            | 2                    | 36 5/7                   |
| DC_0576   | F   | Cauc      | 30 4/7      | 1140       | N               | none                | -            | Y (37 2/7)             | 3            | 1                    | 40 2/7                   |
| DC_0690   | F   | Cauc      | 29          | 930        | N               | none                | -            | Y (35 2/7)             | 4            | 3                    | 42 2/7                   |
| DC_0581   | M   | Cauc      | 27 4/7      | 1010       | Y (3)           | PRP (40 1/7)        | -            | N                      | 0            | 2                    | 43 1/7                   |
| DC_0368   | M   | Other     | 24 6/7      | 630        | Y (3)           | PRP (38 4/7)        | +            | N                      | 0+           | 2                    | 38 4/7                   |
| DC_0422   | F   | Hisp      | 27          | 700        | Y (3)           | PRP (42 3/7)        | +            | N                      | 0            | 1                    | 42 3/7                   |
| DC_0463   | M   | Cauc      | 29          | 905        | Y (2)           | none                | -            | N                      | 0            | 2                    | 35 1/7                   |
| DC_0569   | M   | Cauc      | 29 3/7      | 1540       | Y (1)           | none                | -            | N                      | 0            | 2                    | 35                       |
| DC_0651   | M   | AA        | 27 2/7      | 1130       | Y (2)           | none                | -            | N                      | 0            | 2                    | 37 3/7                   |
| DC_0653   | M   | AA        | 29 2/7      | 1390       | Y (1)           | none                | -            | N                      | 0            | 2                    | 33 4/7                   |
| DC_0801   | F   | Cauc      | 29 5/7      | 610        | Y (3)           | PRP (37 5/7)        | -            | N                      | 0            | 2                    | 40 4/7                   |
| DC_0874   | M   | Cauc      | 26 1/7      | 700        | Y (1)           | none                | -            | N                      | 0            | 3                    | 39 3/7                   |
| DC_0880   | M   | Other     | 27 6/7      | 970        | Y (3)           | none                | -            | N                      | 0            | 2                    | 38                       |

|         |   |          |        |      |        |                  |   |            |     |   |         |
|---------|---|----------|--------|------|--------|------------------|---|------------|-----|---|---------|
| DC_0891 | F | Cauc     | 23 2/7 | 550  | Y (1)  | none             | - | N          | 0+  | 3 | 38 4/7  |
| DC_0890 | M | Hispanic | 24 5/7 | 660  | Y (3)  | PRP (34 6/7)     | + | Y (35 5/7) | 2   | 3 | 37 5/7  |
| DC_0567 | F | Cauc     | 26 5/7 | 480  | Y (3)  | none             | - | Y (38)     | 2   | 2 | 39      |
| DC_0405 | F | AA       | 23     | 580  | Y (3)  | PRP (36 1/7)     | + | Y (42)     | 2   | 0 | 44      |
| DC_0437 | F | AA       | 26 4/7 | 620  | Y (2)  | none             | - | Y (37 1/7) | 2   | 2 | 37 1/7  |
| DC_0450 | F | Cauc     | 25 2/7 | 540  | Y (2)  | none             | - | Y (35 2/7) | 4+δ | 2 | 52 2/7  |
| DC_0558 | F | Cauc     | 28 4/7 | 790  | Y (2)  | none             | - | Y (35 3/7) | 2   | 2 | 39 3/7  |
| DC_0574 | F | AA       | 27 1/7 | 490  | Y (1)  | none             | - | Y (41 3/7) | 3   | 1 | 43 3/7  |
| DC_0687 | M | Cauc     | 24 5/7 | 720  | Y (3)  | none             | - | Y (36 5/7) | 1 § | 2 | 42 5/7  |
| DC_0688 | M | Other    | 24 4/7 | 840  | Y (3)  | none             | - | Y (35 1/7) | 2   | 2 | 36 1/7  |
| DC_0689 | F | Other    | 24 4/7 | 650  | Y (2)  | none             | - | Y (35 1/7) | 3   | 2 | 39 1/7  |
| DC_0697 | F | Cauc     | 31 3/7 | 1070 | Y (2)  | none             | - | Y (37 2/7) | 2   | 2 | 43 2/7  |
| DC_0652 | M | Cauc     | 25 4/7 | 600  | Y (4A) | ‡                | + | Y (36 2/7) | 4   | 3 | 44 2/7  |
| DC_0766 | M | Cauc     | 25     | 940  | Y (3)  | PRP (35 1/7)     | + | Y (36)     | 3   | 3 | 39      |
| DC_0808 | F | Cauc     | 24 3/7 | 465  | Y (3)  | Avastin (33 6/7) | + | Y (34 6/7) | 4   | 3 | 41 6/7  |
| DC_0809 | F | Cauc     | 24 3/7 | 505  | Y (3)  | Avastin (34 6/7) | + | Y (33 6/7) | 4   | 3 | 41 6/7  |
| DC_0455 | M | Cauc     | 27     | 983  | Y (3)  | Avastin (36 1/7) | + | Y (36 1/7) | 4   | 3 | 39 1/7* |

+ Inflection in the inner retina at foveal center (see Figure 3)

§ CME Resolved at 39 5/7

δ CME Resolved at 52 2/7

‡ PRP (35 3/7, 37 3/7), Avastin (39 2/7 OS, 39 4/7 OD)

\* Deceased

[OCT –optical coherence tomography, CME – cystoid macular edema, ROP – retinopathy of prematurity, M – Male, F – Female, PMA – post menstrual age, Y- yes, N- no, wks – weeks, F/U – follow up, PRP - Panretinal Photocoagulation (Laser), Hisp – Hispanic, AA – African American, Cauc - Caucasian]
